# Supplementary material for: Changes in Physical Activity during the COVID-19 Pandemic—An Analysis of Differences Based on Mitigation Policies and Incidence Values in the Federal States of Germany
Source: MDPI journal article supplement (doi:10.3390/sports9070102), 2021-07-15
Supplement: s1 [file s1]

**Supplementary Material Figure S1:** PA changes for each federal state

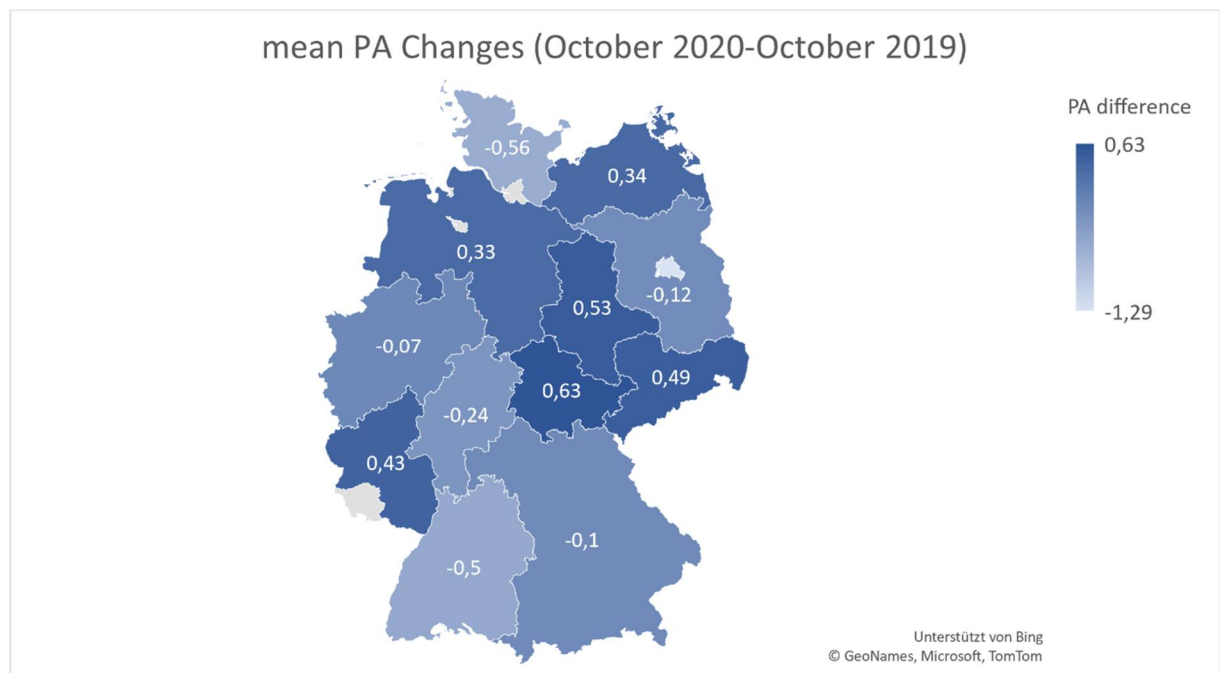

Mean change in PA (hours per week) between pre-Covid-19 and October 2020 in each federal state. A positive value indicates an increase whereas a negative value indicates a decrease of PA.
