# Supplementary material for: Changes in Physical Activity during the COVID-19 Pandemic—An Analysis of Differences Based on Mitigation Policies and Incidence Values in the Federal States of Germany
Source: MDPI journal article supplement (doi:10.3390/sports9070102), 2021-07-15
Supplement: s1 [file s1]

**Supplementary Material Table S1** Policy index for each federal state

| Federal state (mean 7-day-incidence value / 100.000 inhabitants) | Large events with a maximum of xxx people<br>1= $\geq 1,000$<br>2= 500-999<br>3= 200-499<br>4= max. 200                            | Private celebrations with a maximum of xxx people<br>1= > 50<br>2= 30-50<br>3=11-30<br>4= max. 10 | Meetings in public space with a maximum of xxx people<br>1= > 15<br>2= 11-15<br>3= 6-10<br>4= max. 5 | Amount of fine not wearing a mouth-nose-covering<br>1= no fine<br>2= max. 50 EUR<br>3= 50-150 EUR<br>4= > 150 EUR | Schools are...<br>1= normally open<br>2= opened under hygiene requirements<br>3= alternate lessons<br>4= closed | Allowed number of people in organized sports<br>1= no restriction<br>2= > 60<br>3= 31-60<br>4= up to 30 | Square meters (sqm) per person in retail<br>1= no restriction<br>2= 1.5m<br>3= $\geq 10$ sqm<br>4= $\geq 11$ sqm | Index |
|------------------------------------------------------------------|------------------------------------------------------------------------------------------------------------------------------------|---------------------------------------------------------------------------------------------------|------------------------------------------------------------------------------------------------------|-------------------------------------------------------------------------------------------------------------------|-----------------------------------------------------------------------------------------------------------------|---------------------------------------------------------------------------------------------------------|------------------------------------------------------------------------------------------------------------------|-------|
| Baden-Wuerttemberg (46.7)                                        | 4                                                                                                                                  | 4                                                                                                 | 3                                                                                                    | 3                                                                                                                 | 2                                                                                                               | 4                                                                                                       | 2                                                                                                                | 22    |
| Bavaria (48.2)                                                   | 3 outdoors and indoors with certain permanent seating<br>4 Indoors and outdoors without permanent seating<br>= 3.5                 | 4                                                                                                 | 3                                                                                                    | 4                                                                                                                 | 2                                                                                                               | 4                                                                                                       | 3                                                                                                                | 23.5  |
| Berlin (85.2)                                                    | 1                                                                                                                                  | 3 outdoors<br>4 indoors<br>= 3.5                                                                  | 4                                                                                                    | 3                                                                                                                 | 2                                                                                                               | 4                                                                                                       | 2                                                                                                                | 19.5  |
| Brandenburg (21.8)                                               | 1                                                                                                                                  | 3                                                                                                 | 3                                                                                                    | 3                                                                                                                 | 2                                                                                                               | 1                                                                                                       | 2                                                                                                                | 15    |
| Bremen (80.4)                                                    | 3                                                                                                                                  | 3                                                                                                 | 3                                                                                                    | 2                                                                                                                 | 2                                                                                                               | 3                                                                                                       | 2                                                                                                                | 18    |
| Hamburg (43.4)                                                   | 1 outdoors with permanent seating<br>2 indoors with permanent seating<br>4 outdoors and indoors without permanent seating<br>= 2.3 | 3                                                                                                 | 3                                                                                                    | 3                                                                                                                 | 2                                                                                                               | 4                                                                                                       | 3 with retail space 0-800 sqm<br>4 with retail space > 800 sqm<br>= 3.5                                          | 20.8  |
| Hesse (61.3)                                                     | 3                                                                                                                                  | 2                                                                                                 | 3                                                                                                    | 2                                                                                                                 | 2                                                                                                               | 1                                                                                                       | 2                                                                                                                | 15    |

|                                  |                                                                                                                                                    |                                                                                           |   |   |   |   |   |      |
|----------------------------------|----------------------------------------------------------------------------------------------------------------------------------------------------|-------------------------------------------------------------------------------------------|---|---|---|---|---|------|
| Lower Saxony (31)                | 2                                                                                                                                                  | 2 outdoors<br>3 in own flat<br>1 private<br>celebrations in<br>public premises<br><br>= 2 | 3 | 4 | 2 | 3 | 2 | 18   |
| Mecklenburg Vorp.<br>(15.5)      | 2 outdoors<br>4 indoors<br>= 3                                                                                                                     | 1                                                                                         | 3 | 3 | 2 | 2 | 3 | 17   |
| Northrhine-<br>Westphalia (60.5) | 1                                                                                                                                                  | 3                                                                                         | 3 | 3 | 2 | 1 | 3 | 16   |
| Rhineland Palatinate<br>(37)     | 2 outdoors<br>3 indoors<br>= 2.5                                                                                                                   | 3                                                                                         | 3 | 2 | 2 | 4 | 3 | 19.5 |
| Saarland (54.7)                  | 3 outdoors<br>4 indoors<br>= 3.5                                                                                                                   | 3 indoors<br>4 indoors in private<br>premises<br>= 3.5                                    | 3 | 3 | 2 | 3 | 4 | 22   |
| Saxony (37.3)                    | 1                                                                                                                                                  | 3                                                                                         | 3 | 3 | 1 | 1 | 2 | 14   |
| Saxony-Anhalt (15.1)             | 1 outdoors<br>2 indoors<br>= 1.5                                                                                                                   | 2                                                                                         | 3 | 1 | 1 | 3 | 2 | 13.5 |
| Schleswig Holstein<br>(18.8)     | 1 outdoors with<br>permanent seating<br>2 indoors with<br>permanent seating<br>4 outdoors and indoors<br>without permanent<br>seating<br><br>= 2.3 | 2                                                                                         | 3 | 3 | 2 | 1 | 2 | 15.3 |
| Thuringia (22.3)                 | 1                                                                                                                                                  | 1 outdoors<br>2 indoors<br>= 1.5                                                          | 3 | 3 | 2 | 1 | 1 | 12.5 |
